# Supplementary material for: Are scurs in heterozygous polled (Pp) cattle a complex quantitative trait?
Source: Springer Nature journal article supplement (doi:10.1186/s12711-020-0525-z), 2020-02-07

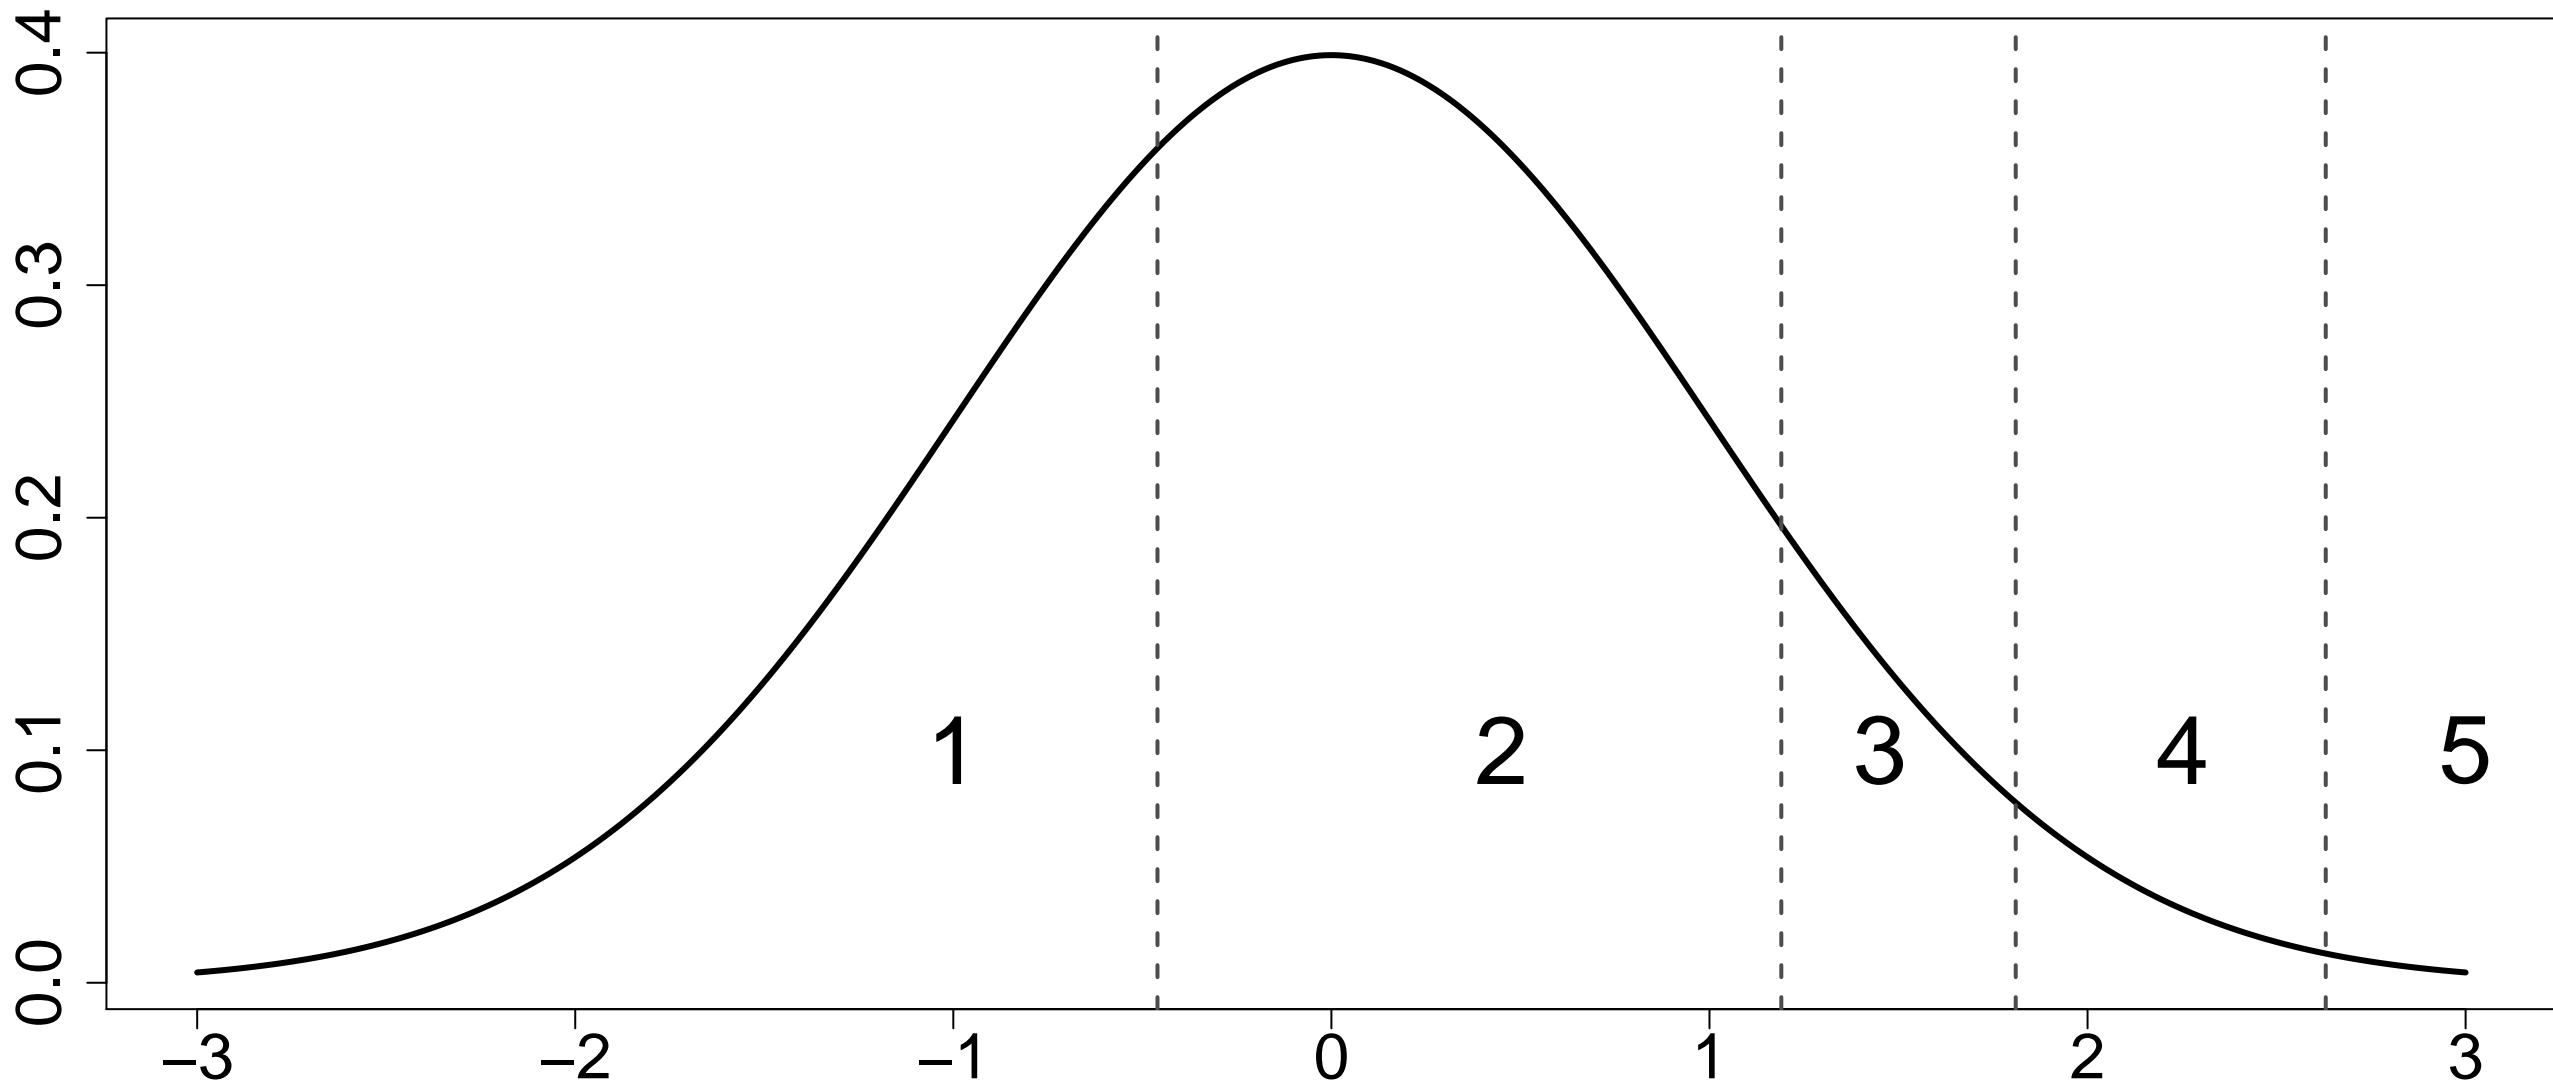

Supplement: MOESM1 [file 12711_2020_525_MOESM1_ESM.pdf]
